# Supplementary material
Source: PubMed Central journal article supplement (PMC164690)
Supplement: pnas_0732061100_3.pdf [file pnas_0732061100_3.pdf]

| <i>Participant</i> | <i>Age</i> | <i>Gender</i> | <i>Electrode placement</i> | <i>Resection</i>            | <i>No. of electrodes</i> | <i>No. included</i> | <i>Accuracy, %</i> | <i>Mean RT, ms</i> |
|--------------------|------------|---------------|----------------------------|-----------------------------|--------------------------|---------------------|--------------------|--------------------|
| 1                  | 17         | M             | Subdural                   | L anterior temporal         | 80                       | 60                  | 98                 | 1,168              |
| 2                  | 12         | F             | Subdural                   | R motor-sensory transection | 104                      | 92                  | 94                 | 970                |
| 3                  | 14         | M             | Depth                      | No resection                | 19                       | 17                  | 99                 | 1,240              |
| 4                  | 21         | M             | Depth/<br>Subdural         | R temporal                  | 76                       | 59                  | 85                 | 1,232              |
| 5                  | 18         | M             | Subdural                   | Anterior temporal           | 64                       | 48                  | 96                 | 655                |
| 6                  | 15         | M             | Subdural                   | R anterior temporal         | 128                      | 97                  | 92                 | 1,158              |
| 7                  | 42         | F             | Depth/<br>Subdural         | R temporal                  | 62                       | 32                  | 90                 | 766                |
| 8                  | 41         | M             | Subdural                   | R temporal                  | 64                       | 52                  | 97                 | 954                |
| 9                  | 38         | M             | Subdural                   | R temporal                  | 94                       | 90                  | 98                 | 1,483              |

**Table 2: Participant demographics and performance.**
