# Supplementary material
Source: PubMed Central journal article supplement (PMC164690)

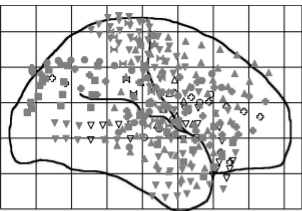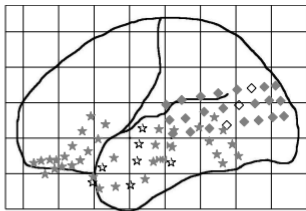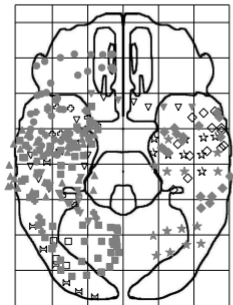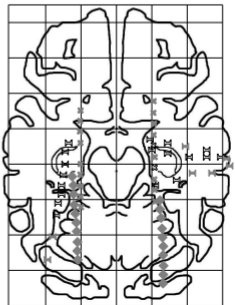

Supplement: pnas_0732061100_2.pdf [file pnas_0732061100_2.pdf]
